# Supplementary material for: Association Between Visual Impairment and Income Change: A Longitudinal Follow-up Study With a National Health Screening Cohort
Source: Research Square preprint supplement (doi:10.21203/rs.3.rs-530551/v1), 2021-05-19
Supplement: Supplementary file 2 [file 8c526ae34b66c0785c823468.docx]

**Supplementary Table 1** Status of income levels by year

| Income  level | 2002 | 2003 | 2004 | 2005 | 2006 | 2007 | 2008 | 2009 | 2010 | 2011 | 2012 | 2013 | 2014 | 2015 |
| --- | --- | --- | --- | --- | --- | --- | --- | --- | --- | --- | --- | --- | --- | --- |
| Total  (n, %) | 514,866  100 | 514,515  100 | 512,802  100 | 509,900  100 | 506,189  100 | 503,007  100 | 498,566  100 | 494,192  100 | 490,255  100 | 487,835  100 | 483,421  100 | 478,740  100 | 472,214  100 | 467,132  100 |
| 0  (n, %) | 515  0.10 | 1,785  0.35 | 3,662  0.71 | 6,123  1.20 | 7,482  1.48 | 8,529  1.70 | 8,764  1.76 | 8,061  1.63 | 8,415  1.72 | 8,550  1.75 | 8,324  1.72 | 8,341  1.74 | 8,345  1.77 | 9,488  2.03 |
| 1  (n, %) | 45,828  8.90 | 43,806  8.51 | 40,699  7.94 | 39,620  7.77 | 37,069  7.32 | 37,002  7.36 | 37,227  7.47 | 36,751  7.44 | 37,019  7.55 | 37,069  7.60 | 37,180  7.69 | 37,192  7.77 | 37,630  7.97 | 37,530  8.03 |
| 2  (n, %) | 35,642  6.92 | 35,330  6.87 | 35,242  6.87 | 32,652  6.40 | 31,046  6.13 | 30,875  6.14 | 29,679  5.95 | 28,941  5.86 | 31,404  6.41 | 32,078  6.58 | 31,179  6.45 | 29,593  6.18 | 29,213  6.19 | 28,126  6.02 |
| 3  (n, %) | 36,580  7.10 | 33,516  6.51 | 34,395  6.71 | 35,732  7.01 | 34,254  6.77 | 32,836  6.53 | 33,351  6.69 | 32,252  6.53 | 31,050  6.33 | 31,992  6.56 | 30,307  6.27 | 31,576  6.60 | 31,161  6.60 | 30,514  6.53 |
| 4  (n, %) | 37,489  7.28 | 36,704  7.13 | 35,562  6.93 | 38,012  7.45 | 36,842  7.28 | 35,428  7.04 | 33,722  6.76 | 33,340  6.75 | 32,670  6.66 | 32,099  6.58 | 31,113  6.44 | 30,444  6.36 | 30,904  6.54 | 31,779  6.80 |
| 5  (n, %) | 39,124  7.60 | 39,609  7.70 | 38,204  7.45 | 37,563  7.37 | 37,365  7.38 | 38,393  7.63 | 37,646  7.55 | 37,159  7.52 | 35,881  7.32 | 36,210  7.42 | 35,016  7.24 | 34,530  7.21 | 34,381  7.28 | 33,902  7.26 |
| 6  (n, %) | 42,577  8.27 | 41,608  8.09 | 41,939  8.18 | 42,082  8.25 | 44,304  8.75 | 42,851  8.52 | 41,430  8.31 | 41,649  8.43 | 40,851  8.33 | 40,103  8.22 | 39,449  8.16 | 39,134  8.17 | 39,333  8.33 | 37,773  8.09 |
| 7  (n, %) | 48,569  9.43 | 49,693  9.66 | 49,673  9.69 | 48,491  9.51 | 48,105  9.50 | 48,214  9.59 | 47,644  9.56 | 46,929  9.50 | 46,531  9.49 | 46,199  9.47 | 44,815  9.27 | 44,702  9.34 | 44,125  9.34 | 44,171  9.46 |
| 8  (n, %) | 57,208  11.11 | 58,632  11.40 | 57,914  11.29 | 56,963  11.17 | 56,251  11.11 | 56,022  11.14 | 56,328  11.30 | 56,291  11.39 | 55,707  11.36 | 55,050  11.28 | 54,429  11.26 | 53,776  11.23 | 53,822  11.40 | 53,522  11.46 |
| 9  (n, %) | 79,460  15.43 | 79,648  15.48 | 80,043  15.61 | 79,199  15.53 | 78,116  15.43 | 76,621  15.23 | 76,858  15.42 | 76,214  15.42 | 75,312  15.36 | 74,416  15.25 | 74,849  15.48 | 73,630  15.38 | 70,658  14.96 | 68,777  14.72 |
| 10  (n, %) | 91,874  17.84 | 94,184  18.31 | 95,469  18.62 | 93,463  18.33 | 95,355  18.84 | 96,236  19.13 | 95,917  19.24 | 96,605  19.55 | 95,415  19.46 | 94,069  19.28 | 96,760  20.02 | 95,822  20.02 | 92,642  19.62 | 91,550  19.60 |

Currency, converted to US dollar
